# Long-Term Efficacy of First Line Antiretroviral Therapy in Indian HIV-1 Infected Patients: A Longitudinal Cohort Study

Ujjwal Neogi<sup>1,2\*</sup>, Elsa Heylen<sup>3</sup>, Anita Shet<sup>4</sup>, Sara Chandy<sup>5</sup>, Ranjani Shamsunder<sup>2</sup>, Anders Sönnnerborg<sup>1</sup>, Maria L. Ekstrand<sup>3</sup>

**1** Unit of Infectious Diseases, Department of Medicine Huddinge, Karolinska Institutet, Stockholm, Sweden, **2** Division of Clinical Virology, Department of Microbiology, St. John's Medical College, Bangalore, Karnataka, India, **3** University of California San Francisco, Department of Medicine, San Francisco, California, United States of America, **4** Department of Paediatrics, St. John's Medical College Hospital, Bangalore, Karnataka, India, **5** Department of Medicine, St. John's Medical College Hospital, Bangalore, Karnataka, India

## Abstract

**Background:** Short term efficacy of combination antiretroviral therapy (cART) in resource-constrained settings is comparable to that found in western studies. However, long term data are limited. India has the third largest HIV infected population in the world but the long-term outcome of first line therapy according to the national guidelines has not been evaluated yet. Therefore, we conducted a long-term longitudinal analysis of the efficacy of the national first-line therapy in India from an observational cohort of Indian patients in two different clinical settings.

**Methodology/Principal Findings:** A total 323 patients who had been on ART for a median of 23 months and achieved virological suppression <100 copies/ml by their study baseline visit, were included and followed for two years. Blood samples were collected every six months for viral load and CD4 count. Drug resistance genotyping was performed when the viral load was >2000 copies/mL. Adherence and treatment interruptions (>48 h) were assessed via self-report. In the studied patients, the median duration of viral suppression was 44 months; 15.8% of patients showed viral rebound, and 2.8% viral failure. Viral rebound or failure was significantly negatively related to perfect adherence (100% adherence and no treatment interruption >48 hrs). Virological re-suppression in the subsequent visit was observed in three patients without any change in therapy despite the presence of key mutations.

**Conclusion/Significance:** Our study reports for the first time, a good long-term response to the first line therapy for a median of nearly four years although a less than perfect adherence increases the risk for treatment failure and subsequent drug resistance development. The empirical findings in this study also indicate the overall success of the Indian ART program in two different settings which likely are representative of other clinics that operate under the national guidelines.

**Citation:** Neogi U, Heylen E, Shet A, Chandy S, Shamsunder R, et al. (2013) Long-Term Efficacy of First Line Antiretroviral Therapy in Indian HIV-1 Infected Patients: A Longitudinal Cohort Study. PLoS ONE 8(1): e55421. doi:10.1371/journal.pone.0055421

**Editor:** Barbara Ensoli, Istituto Superiore di Sanità, Italy

**Received:** October 1, 2012; **Accepted:** December 22, 2012; **Published:** January 30, 2013

**Copyright:** © 2013 Neogi et al. This is an open-access article distributed under the terms of the Creative Commons Attribution License, which permits unrestricted use, distribution, and reproduction in any medium, provided the original author and source are credited.

**Funding:** This research was supported by grant R01MH067513 from the National Institute of Mental Health (NIMH) (Bethesda, MD, USA) to MLE and the Swedish Physicians against AIDS fund (FOa2011-0014) to UN. A Sonnerborg acknowledges the support received from EU FP7 CHAIN grant. The funders had no role in study design, data collection and analysis, decision to publish, or preparation of the manuscript.

**Competing Interests:** The authors have declared that no competing interests exist.

\* E-mail: [ujjwal.neogi@ki.se](mailto:ujjwal.neogi@ki.se)

## Introduction

The attainment and maintenance of sustained viral suppression is the ultimate goal of antiretroviral therapy (ART). The optimal response to therapy is the substantial decrease in viral load (VL) to below the technical specificities of the VL assays which results in the avoidance of emergence of drug resistance mutations [1]. The treatment guidelines in resource rich settings recommend performing VL monitoring every 3–6 months [2]. However, in resource constrained settings like sub-Saharan Africa and India, treatment efficacy is typically monitored through immunological markers such as measurement of CD4+ T cell count, [3] whereas VL monitoring is usually restricted to research settings. Despite this caveat, the short term outcomes of cART in resource-constrained settings are comparable to those in resource-rich

settings [4,5]. The data on long term outcome, however, are limited as most of the studies have been conducted within the first two years after initiation of ART [5].

The National AIDS Control Organisation (NACO) sponsored by the government of India, initiated the National AIDS Control Program (NACP) to provide free ART through established ART-centres in April 2004 [6]. Currently, nearly 384,000 HIV-1 infected individuals are receiving free ART with one non-nucleoside reverse transcriptase inhibitor (NNRTI), either nevirapine (NVP) or efavirenz (EFV), in combination with two nucleoside reverse transcriptase inhibitors (NRTI); zidovudine (AZT) or stavudine (d4T), and lamivudine (3TC) [7].

India has the third largest HIV-1 epidemic in the world with a burden of nearly 2.5 million people, where HIV-1 subtype C is the

predominating subtype [8]. A previous study with a small number of patients ( $n=40$ ) using generic ART identified a rapid suppression of HIV-1 viral load [9]. However data on long term efficacy of the national first line regimen is lacking.

Therefore, to understand the clinical impact of the Indian national ART guideline, the primary purpose of our study was to investigate long term virological outcome among Indian HIV-1 infected patients on first-line therapy, following initial viral suppression. In addition, we evaluated the factors associated with virological rebound, its consequences, and emergence of drug resistance mutations.

## Materials and Methods

### Study sample

The sample described in this paper was derived from a large observational clinical cohort of 533 patients from two tertiary care hospitals in the southern part of India, which adhere to the national therapeutic guidelines [10,11]. The criteria used for inclusion in these analyses were: (i) Adult HIV-1 infected patients initiated on first-line ART for a minimum period of 6 months, and (ii) a viral load  $<100$  copies/ml at the time of entry into the study. First line ART included two NRTI and one NNRTI drug. A total 323 patients met these inclusion criteria. The patients were followed up for every 3 months and evaluated for self-reported adherence, adherence barriers and other health behaviours, and lab samples were collected every 6 months for a total follow-up period of 2 years.

### CD4+ T-cell count, viral load and drug resistance genotyping

Blood samples were collected in EDTA tubes. CD4 count was measured using a single platform flow cytometric assay (PCA system; Guava Technologies Inc., Hayward, CA, USA). Viral load was measured by an in-house real time polymerase chain reaction with TAQMAn assay at Molecular Diagnostics and Genetics, Reliance Life Sciences, Mumbai, India. Given the lower detection limit of the VL assay ( $<100$  copies/mL), intermittent viral rebound was defined as a single episode of detectable viral load  $>100$  copies/mL. Virological failure was defined as two successive viral load values  $>400$  copies/mL. Patients with VL  $>2000$  copies/mL were genotyped for drug resistance using in-house techniques [12,13]. The drug resistance genotyping was successfully performed on 16 patients samples during their first viremia and a further six in the next visit who had viral load  $>2000$  copies/ml. The mutations were interpreted using International AIDS Society updated drug resistance mutations in 2011 (IAS\_2011) [14]. The resistance data was not used for treatment decisions.

### HIV-1 subtyping

HIV-1 subtyping was determined using the maximum likelihood (ML) phylogenetic tree using the reference sequences downloaded from Los Alamos Database ([www.hiv.lanl.gov](http://www.hiv.lanl.gov)).

### Adherence measurements

Self-reported adherence was measured using a Visual Analogue Scale (VAS) which has been found to predict virological failure better than other self-report measures in this setting [15]. In the present study, two types of adherence measurements were combined into one dichotomous “perfect adherence” variable: Percent of prescribed pills taken, assessed with the Visual Analogue Scale (VAS) and Treatment interruptions, defined as having missed medications for more than 48 hours in the past

three months. To be classified as “perfectly adherent”, patients had to report 1) taking 100% of prescribed doses in the past three months (past one month at baseline) at each study visit in which they were present and 2) zero treatment interruptions during the 2-year study period.

### Statistical analysis

Differences between groups on continuous variables were examined by independent sample *t*-test or Mann–Whitney *U*-test, while categorical variables were analyzed via frequencies and cross-tabulations, with  $\chi^2$  tests to assess the significance of the associations. All analyses were conducted in PASW Statistics version 18.

### Ethical Considerations

The study was approved by the Committee for Human Research at University of California, San Francisco, USA and the Institutional Ethical Review Board of St John’s Medical College and Hospital, Bangalore, India. Written informed consent was obtained from all the study participants before enrolling into the study.

## Results

### Patient demographics and clinical characteristics

The demographic and clinical characteristics of the 323 patients at baseline and during the two year follow-up period are presented in Table 1. Almost three quarters of participants were male, and mean (SD) age at baseline was 38 (8.5) years. Most participants (87.9%) were on a NVP-based regimen. The mean (SD) duration of treatment at baseline was 23 (11) months. Median CD4+T cell count at baseline was 370 cells/mm<sup>3</sup> (IQR: 243–525). During the study period 35.3% (114/323) patients maintained a good immunological profile (CD4  $>350$  cells/mm<sup>3</sup>) at all waves in which they were present. The median duration of viral suppression was 44 months (IQR 36–54) and 15.8% (51/323) of patients showed intermittent viral rebound without failure during the study period. Viral failure was observed in only 2.8% (9/323) of patients. Among the patients, 75.2% (243/323) was able to maintain  $\geq 95\%$  adherence throughout the study and 47.4% (153/323) were able to maintain perfect adherence (100% adherence by VAS and no treatment interruptions) during the same time (Table 1). Patients with a single episode of viral rebound had a significantly lower mean viral load compared to the failure group during their first viremia (3.2 vs 4.0 Log copies/mL;  $p=0.047$ ) (Table 2). Mean CD4+T cell counts during first viral rebound were also low in the viral failure group compared to the viral rebound group (284 cells/mm<sup>3</sup> vs. 404 cells/mm<sup>3</sup>), but the difference was not statistically significant ( $p=0.147$ ) due to lack of statistical power, given the small number of patients ( $n=9$ ) with viral failure.

### HIV-1 subtyping

HIV-1 subtyping using the Maximum likelihood (ML) phylogenetic tree with the best fitting general time reversible substitution model with inverse gamma distribution (GTR+G+I) with 500 bootstrapped data sets identified all the study sequences as HIV-1 subtype C (Figure 1), which is predominant in India [8].

### Correlates of viral rebound/failure

Comparisons between participants with and without viral rebound/failure (Table 3) showed that about half of those without rebound/failure reported maintaining perfect adherence (100% adherence without any treatment interruption) during the study period, compared to less than a third of those who did experience

**Table 1.** Patients’ demographic, clinical and laboratory parameters at baseline and whole study period of 2 years.

| Variable          | Parameter                                           |
|-------------------|-----------------------------------------------------|
| <b>Baseline</b>   | Total number of patients, N (%)                     |
|                   | Gender, N (%)                                       |
|                   | Male                                                |
|                   | Female                                              |
|                   | Transgender                                         |
|                   | Age, Mean (SD), years                               |
|                   | Duration of treatment, Mean (SD), months            |
|                   | CD4 cell count, Median (IQR), cells/mm <sup>3</sup> |
|                   | Drug regimen at baseline, N (%)                     |
|                   | d4T+3TC+NVP                                         |
|                   | AZT+3TC+NVP                                         |
|                   | d4T+3TC+EFV                                         |
|                   | AZT+3TC+EFV                                         |
|                   | FTC+TDF+EFV                                         |
|                   | DDI+3TC+NVP                                         |
| <b>Follow-up*</b> | Intermittent viral rebound, N (%)                   |
|                   | Virological failure, N (%)                          |
|                   | Treatment Interruptions, N (%)                      |
|                   | ≥ 95% Adherence, N (%)                              |
|                   | Perfect Adherence, N (%)                            |
|                   | Duration of viral suppression Median (IQR), years   |

**Abbreviations:** d4T, Stavudine; 3TC, lamivudine; AZT, zidovudine; FTC, emtricitabine; TDF, tenofovir; NVP, Nevirapine; EFV, Efavirenz; SD, Standard deviation; IQR, interquartile range; N, Number; PVL, plasma viral load; VAS, Visual analogue scale.

\*Over the study period of 2 years, doi:10.1371/journal.pone.0055421.t001

viral rebound/failure (p = 0.007). None of the other variables were significantly associated with viral rebound/failure.

**Drug resistant genotyping**

Drug resistance mutations were identified in 9 of the 16 patients with VL > 2000 at their first instance of viremia during the study period (M184V: 8; K70R: 1; K65R: 1; G190A: 4; K103N: 3; Y181C: 3; V108I: 3; H221Y: 2) (Table 4). Among these 16 patients, seven had successfully controlled the viremia in their subsequent 6-month follow up study visit without any change of therapy. Of the seven controlled viremics, three had multiple

major NRTI/NNRTI mutations [M184V+G190A; M184V+K103N; M184V+Y181C) during their viral rebound, but later suppressed as they maintained >95% adherence both before and after the viral rebound. Further, all three patients maintained good immunological conditions (mean CD4+ T cell count 618 cells/mm<sup>3</sup>) in their remaining study visits for 12 months, 18 months and 6 months, respectively.

Among the six patients with virological failure who had high viremia during their first viral rebound, four had accumulated more NRTI drug resistance mutations (DRMs) in their follow up visit (data not shown).

**Discussion**

Our results indicate a good overall long-term response to first line therapy reflecting an overall success of the standardized Indian national program for individuals with HIV infection. By the end of the two-year study period, 81.4% of the patients remained virologically suppressed for a total median duration of nearly four years (based on time on ART at baseline + two-year study period) and this efficacy is likely to continue be longer as most of the patients reached the study endpoint with good immuno-virological conditions. As the study was conducted in two different settings, one public tertiary care hospital and one non-profit private tertiary care hospital, which follow the same therapeutic guidelines, recommended by the NACO, it is likely that the results are generalizable to other Indian clinics that follow the same protocols.

Previous studies on short term efficacy of antiretroviral therapy from resource limited settings, within two years after initiation, have obtained comparable results to studies conducted in resource rich settings in Europe and America [4,5]. A recent systemic review showed that in sub-Saharan Africa, 67% of the patients achieved virological success after 2 years of therapy [5]. However, long term follow up data after 2 years of therapy, are limited. A study from Botswana, estimated virological failure in 22.1% and 30.1% of HIV-1 subtype C infected patients at 3 and 5 years respectively [16]. A study from South Africa reported that 61% of the patients achieved virological suppression at 3 years [17]. A study from Burkina Faso reported that 81.8% of the patients remained virologically suppressed at 3 years [18]. Our study showed that 81.4% of the patients who initially achieved viral load <100 copies in our setting, remained virologically suppressed for a median of almost four years, 15.8% had an intermittent viral rebound, and only 2.8% of patients experienced a true virological failure. This study is the first to document the favourable treatment response of a median of nearly four years duration with the national first line treatment regimen in India.

Non-adherence to therapy has been shown to be associated with intermittent viremia [19,20] in therapy experienced patients. A

**Table 2.** Clinical and demographic parameters during first viral rebound for viral failure and intermittent viral rebound groups.

| Parameter                                           | Viral Failure (n=9) | Viral Rebound (n=51) | p value <sup>a</sup> |
|-----------------------------------------------------|---------------------|----------------------|----------------------|
| Age in years at baseline: mean (SD)                 | 35.4 (6.7)          | 38.5 (10.1)          | 0.390                |
| Male: n (%)                                         | 8 (88.9)            | 35 (68.6)            | 0.423                |
| CD4-T cell count; cells/mm <sup>3</sup> : mean (SD) | 284 (241)           | 404 (224)            | 0.147                |
| Viral load (log transformed): mean (SD)             | 4.0 (1.2)           | 3.2 (1.0)            | 0.047                |
| 100% adherence past month: n (%)                    | 5 (55.6)            | 40 (80.0)            | 0.195                |

<sup>a</sup>p-value based on t-test (d.f. = 58) for age and CD4 count and viral load, Fisher’s exact test (d.f. = 1) for male gender and adherence. doi:10.1371/journal.pone.0055421.t002

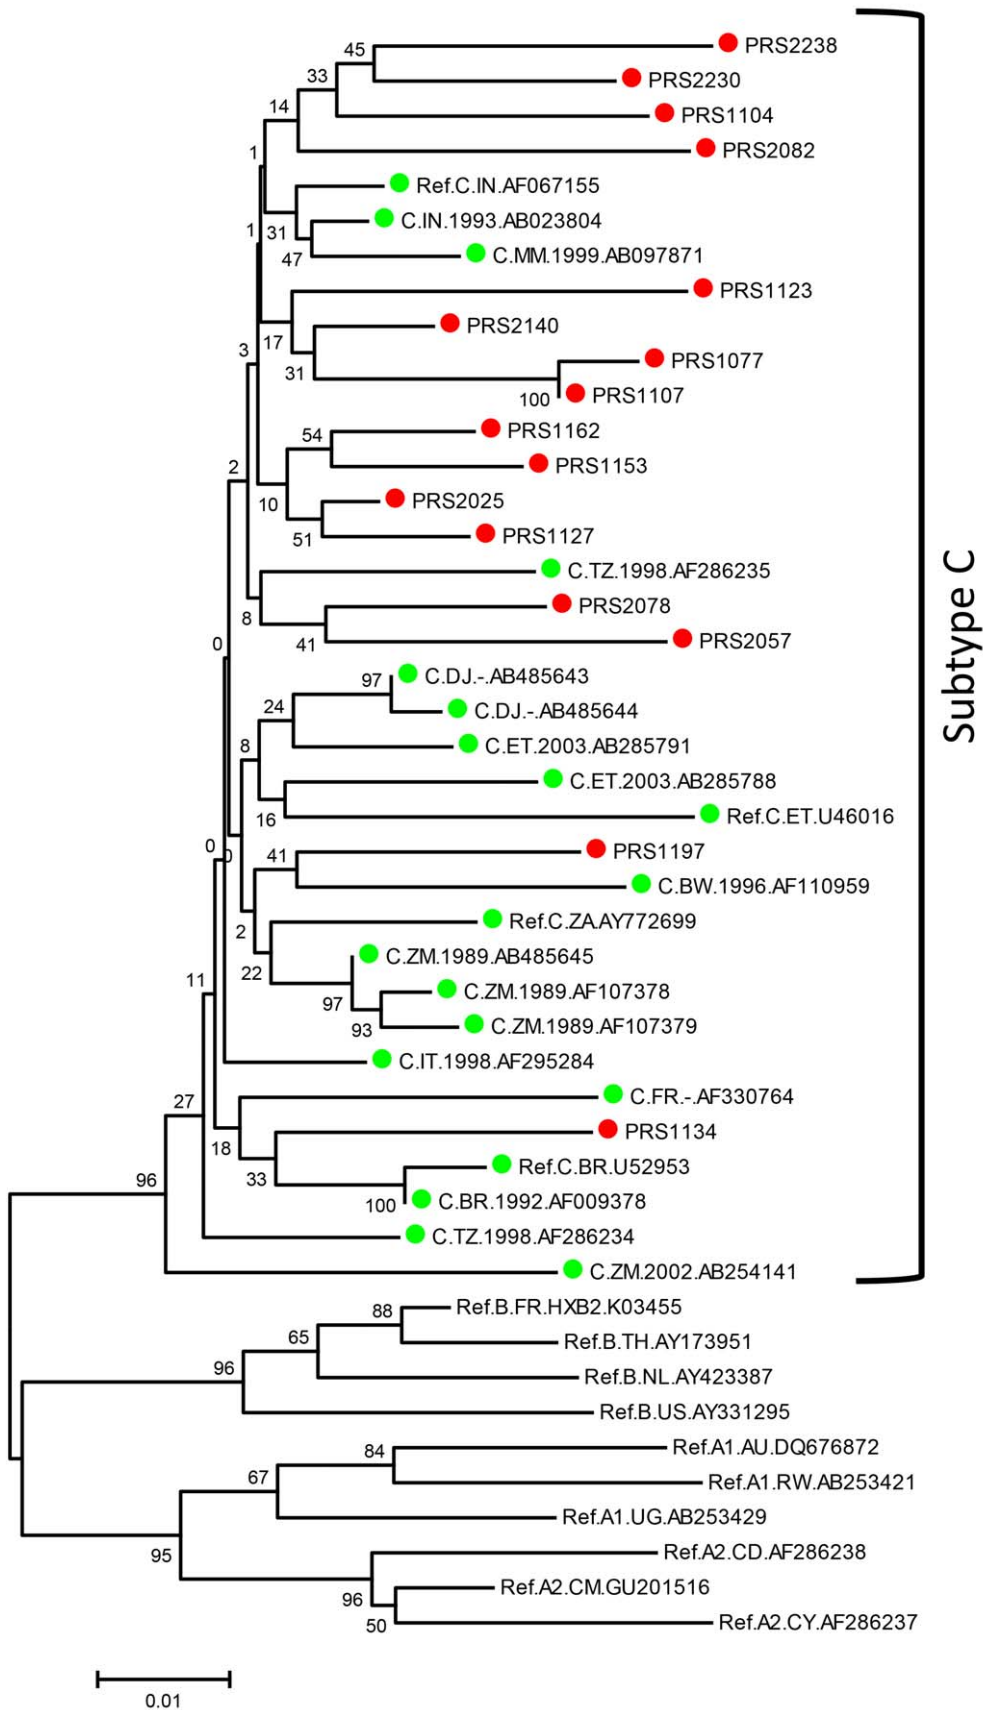

**Figure 1. Phylogenetic analysis for characterisation of HIV-1 subtypes: The phylogenetic tree was constructed using general time reversible (GTR) model with gamma distribution and invariant sites (GTR+G+I) as observed best fitted model for the dataset with cohort sequences and reference sequences downloaded from Los Alamos Database (www.hiv.lanl.gov). Subtype C reference sequences from different countries are marked with green filled circle. Cohort sequences are shown with red filled circle.**  
doi:10.1371/journal.pone.0055421.g001

significant relationship between adherence (including treatment interruptions) and viremia was observed in our study, which is consistent with previous findings in this region [10]. However our study contradicts a recent study from British Columbia, Canada, which showed the probability of viral rebound was lower in patients who had longer duration of viral suppression and was independent of adherence level [21]. The discrepancies in the two settings might be due to the drug regimen used. Thus, our study showed that the risk of viral rebound in perfectly adherent patients is lower than in imperfectly adherent patients. Previous work in our setting has shown that individual-level adherence barriers (away from home, busy with other things, and simply forgetting) and medication side effects are the major obstacles for adherence [11,15,22].

Previous studies have shown that sub-optimal adherence, treatment interruptions and improper dosing can lead to drug resistance [10,23,24]. A recent meta-analysis on studies from resource limited settings showed that early identification of virological failure limits the emergence of drug resistance [25]. In our study, three patients with virological rebound showed major mutations, including M184V, K103N and Y181C. However, at the next visit, their viral load was suppressed to below the detectable limit. It is important to note that these three patients had good immunological status during that time and good adherence throughout the study periods. Studies from Sweden, Belgium and South Africa showed that despite the presence of NRTI mutations such as M184V, viral re-suppression occurred in a fraction of patients with virological rebound [26–29]. Studies on subtype C virus from South Africa showed that despite the presence of NNTRI mutations such as K103N, V106M and G190A, a fraction of patients were successfully re-suppressed on the same regimen [28,29]. It was also proposed that supporting the adherence with special targeted counselling without any treatment change among such patients could be of cost benefit for the public health system in resource constrained settings. Our finding corroborates this idea. The patients in our settings are under good adherence counselling as part of a standardised national program and maintained an overall good adherence profile throughout the study period. Though 19% of the patients presented viral rebound, only 2.8% of the patients finally failed virologically. This combination of findings by us and others provides support for the conceptual premise that viral load measurement can act as an indicator for adherence. Early identification of viremia and targeted special adherence counsel-

ling to these patients with viral rebound may limit the need to switch to the second line of therapy.

In contrast, among the six virologically failing patients who had higher viremia during their first viral rebound, four accumulated new NRTI mutations by their subsequent follow-up visit, which is concordant with a previous finding from South Africa which observed increase in NRTI DRMs in 88% of subtype C infected patients between two visits (6 to 12 months apart) [30]. Accumulation of NRTI mutations which confers low-level resistance to tenofovir may limit the use of this drug, which is a part of India's national second line therapy. The results from our study settings, where HIV-1 subtype C is predominant [8] are consistent with those of other studies on subtype C virus from South Africa [28,29]. In the same setting, we previously also showed that four out of ten patients with NVP and EFV failure accumulated cross-resistance against etravirine [31]. Therefore it is important to identify early virological failure to limit the emergence of cross-resistance to other drugs.

Given limited drug options, patients who have good immunological status with minimal drug resistance and low viremia may still get benefit from their first line regimen as observed by us and others [26–29]. In contrast, patients with compromised immunological status and viremia should be switched to second line therapy immediately to limit the emergence of drug resistance and cross-resistance which may jeopardise the second line options. Some of the issues emerging from this finding relate specifically to using multiple approaches to optimise the treatment switch to second line therapy. Patients' immunological (CD4 count), virological (viral load) and drug resistance data should all be used for optimal treatment switch decisions. Further research on this topic needs to be conducted to determine the role of drug resistance mutations such as M184V, K103N, V106M and Y181C in viral fitness and recognition of cytotoxic T lymphocyte (CTL) and T-helper epitopes within RT, specifically in HIV-1 subtype C strains and their potential role in the therapy response against these HIV-1 subtype C viruses.

A number of caveats need to be noted regarding the present study. First, the number of patients was relatively small. Second, the adherence measurements by self-report may overestimate the outcome. Third, the majority of the patients in this cohort showed good adherence throughout the study period, which may also have influenced the outcome. Therefore our findings may not generalize to other geographical settings in the country, where the adherence is considerably lower. Finally, we are not able to

**Table 3. Viral rebound/failure and its associations with patients' demographic, clinical, and behavioural parameters.**

| Variables                                                                    | Viral rebound/failure (n = 60) | No viral rebound/failure (n = 263) | p value <sup>a</sup> |
|------------------------------------------------------------------------------|--------------------------------|------------------------------------|----------------------|
| Age in years: mean (SD)                                                      | 38.0 (9.7)                     | 37.6 (8.3)                         | 0.703                |
| Male: n (%)                                                                  | 43 (71.7)                      | 192 (73.0)                         | 0.834                |
| Mean CD4 –T cell count in cells/mm <sup>3</sup> over study period: mean (SD) | 410 (217)                      | 420 (221)                          | 0.758                |
| Regimen switch: n (%)                                                        | 29 (48.3)                      | 116 (44.1)                         | 0.553                |
| Perfect Adherence: n (%)                                                     | 19 (31.7)                      | 134 (51.0)                         | 0.007                |

<sup>a</sup>p-value based on t-test (d.f. = 321) for age and mean CD4 count, chi-square test (d.f. = 1) for male gender, regimen switch and perfect adherence.  
doi:10.1371/journal.pone.0055421.t003

**Table 4.** Characteristics of patients (n = 16) with VL > 2000 at first virological rebound/failure.

| Patient ID | CD4 count (cells/mm <sup>3</sup> ) | VL at rebound (copies/mL) | VL at follow-up (copies/mL)* | Months on ART at viral rebound | Therapy             | NRTI Resistance | NNRTI Resistance                        |
|------------|------------------------------------|---------------------------|------------------------------|--------------------------------|---------------------|-----------------|-----------------------------------------|
| 1077       | 33                                 | 70500                     | 38850                        | 34                             | AZT+3TC+NVP         | M184V           | G190A                                   |
| 1104       | 711                                | 1144100                   | <100                         | 53                             | AZT+3TC+NVP         | None            | None                                    |
| 1107       | 895                                | 3750                      | <100                         | 40                             | AZT/d4T+3TC+NVP     | M184V           | G190A                                   |
| 1123       | 398                                | 2300                      | 1000                         | 36                             | d4T+3TC+NVP         | None            | None                                    |
| 1127       | 74                                 | 1699300                   | NA                           | 38                             | d4T+3TC+NVP         | None            | None                                    |
| 1134       | 214                                | 4900                      | 2950                         | 36                             | d4T+3TC+NVP         | K70R, M184V     | V108I, Y181C, H221Y                     |
| 1153       | 160                                | 342300                    | <100                         | 48                             | d4T/AZT+3TC+NVP     | None            | None                                    |
| 1162       | 176                                | 4726550                   | <100                         | 22                             | d4T+3TC+NVP         | None            | None                                    |
| 1197       | 753                                | 5550                      | <100                         | 35                             | AZT+3TC+NVP         | M184V           | K103N                                   |
| 2025       | 427                                | 5350                      | NA                           | 40                             | d4T+3TC+NVP         | None            | None                                    |
| 2057       | 19                                 | 3050                      | NA                           | 47                             | AZT/d4T/DDH+3TC+NVP | K65R, M184V     | K103N, V108I                            |
| 2078       | 147                                | 14350                     | 15300                        | 41                             | d4T+3TC+NVP/EFV     | M184V           | K103N                                   |
| 2082       | 21                                 | 764100                    | 435100                       | 30                             | d4T+3TC+NVP/EFV     | None            | A98G, K101E, V108I, Y181C, G190A, H221Y |
| 2140       | 560                                | 43000                     | <100                         | 13                             | d4T+3TC+NVP         | None            | None                                    |
| 2230       | 324                                | 30700                     | <100                         | 30                             | AZT+3TC+EFV/NVP     | M184V           | Y181C                                   |
| 2238       | 98                                 | 333300                    | 62388                        | 29                             | AZT+3TC+EFV/NVP     | M184V           | K101E, V106M, G190A                     |

Abbreviations: 3TC, lamivudine; AZT, zidovudine; d4T, Stavudine; DDI, didanosine; EFV, Efavirenz; HAART, highly active antiretroviral therapy; NNRTI, non- nucleoside reverse-transcriptase inhibitors; NRTI, nucleoside reverse-transcriptase inhibitors; NVP, Nevirapine; VL, viral load. \*VL follow-up after 6 months.  
doi:10.1371/journal.pone.0055421.t004

genotype the patients who had viral load below <2000 copies/mL. However a technical merit of our study is that it reflects the natural clinical practices in the setting where the national guidelines are followed.

In conclusion, our study documents for the first time the evidence that among patients who reported perfect adherence to a standardized national first line regimen, the vast majority of the virologically suppressed patients continued responding well to the therapy after nearly four years. Our results also strongly support virological monitoring in the setting. It serves not only to detect early virological failure, but can also be used to alert clinicians to the need for targeted adherence interventions for those patients whose viral rebound indicates sub-optimal adherence. The accumulation of new NRTI mutations also supports calls for virological monitoring to identify early failure to avoid the development of cross-resistance to other NRTI drugs. Such cross resistance may jeopardise the national second line options which include two NRTI drugs. Future research should therefore investigate the role of drug resistance and treatment outcome

## References

- Staszewski S, Miller V, Sabin C, Schlecht C, Gute P, et al. (1999) Determinants of sustainable CD4 lymphocyte count increases in response to antiretroviral therapy. *AIDS* 13: 951–956.
- Aldous JL, Haubrich RH (2009) Defining treatment failure in resource-rich settings. *Curr Opin HIV AIDS* 4: 459–466.
- World Health Organization. Antiretroviral therapy for HIV infection in adults and adolescents: recommendations for a public health approach. 2010 revision. Geneva: World Health Organization; 2010. pp. 1–359. Available at [http://whqlibdoc.who.int/publications/2010/9789241599764\\_eng.pdf](http://whqlibdoc.who.int/publications/2010/9789241599764_eng.pdf). Accessed 06 February 2012.
- Ivers LC, Kendrick D, Doucette K (2005) Efficacy of antiretroviral therapy programs in resource-poor settings: a meta-analysis of the published literature. *Clin Infect Dis* 41: 217–224.
- Barth RE, van der Loeff MF, Schuurman R, Hoepelman AI, Wensing AM (2010) Virological follow-up of adult patients in antiretroviral treatment programmes in sub-Saharan Africa: a systematic review. *Lancet Infect Dis* 10: 155–166.
- National AIDS Control Organization, Annual Report, 2009–2010, Available at [http://nacoonline.org/upload/AR%202009-10/NACO\\_AR\\_English%20corrected.pdf](http://nacoonline.org/upload/AR%202009-10/NACO_AR_English%20corrected.pdf). Accessed on 26 April 2011.
- Patients alive and on antiretroviral therapy, National AIDS Control Organization, New Delhi, India. Available at [http://www.nacoonline.org/Quick\\_Links/HIV\\_Data/Patients\\_alive\\_and\\_on\\_ART/](http://www.nacoonline.org/Quick_Links/HIV_Data/Patients_alive_and_on_ART/). Accessed on Sept 4, 2011.
- Neogi U, Bontell I, Shet A, De Costa A, Gupta S, et al. (2012) Molecular Epidemiology of HIV-1 Subtypes in India: Origin and Evolutionary History of the Predominant Subtype C. *PLoS One* 7: e39819.
- Kumarasamy N, Vallabhaneni S, Flanigan TP, Balakrishnan P, Cecelia A, et al. (2005) Rapid viral load suppression following generic highly active antiretroviral therapy in Southern Indian HIV-infected patients. *AIDS* 19: 625–627.
- Ekstrand ML, Shet A, Chandu S, Singh G, Shamsundar R, et al. (2011) Suboptimal adherence associated with virological failure and resistance mutations to first-line highly active antiretroviral therapy (HAART) in Bangalore, India. *Int Health* 3: 27–34.
- Shet A, DeCosta A, Heylen E, Shastris S, Chandu S, et al. (2011) High rates of adherence and treatment success in a public and public-private HIV clinic in India: potential benefits of standardized national care delivery systems. *BMC Health Serv Res* 11: 277.
- Saravanan S, Vidya M, Balakrishnan P, Kumarasamy N, Solomon SS, et al. (2009) Evaluation of two human immunodeficiency virus-1 genotyping systems: ViroSeq 2.0 and an in-house method. *J Virol Methods* 159: 211–216.
- Neogi U, Prarthana BS, Gupta S, D'Souza G, De Costa A, et al. (2010) Naturally occurring polymorphisms and primary drug resistance profile among antiretroviral-naïve individuals in Bangalore, India. *AIDS Res Hum Retroviruses* 26: 1097–1101.
- Johnson VA, Calvez V, Gunthard HF, Paredes R, Pillay D, et al. (2011) 2011 update of the drug resistance mutations in HIV-1. *Top Antivir Med* 19: 156–164.
- Ekstrand ML, Chandu S, Heylen E, Steward W, Singh G (2010) Developing useful highly active antiretroviral therapy adherence measures for India: the Prerana study. *J Acquir Immune Defic Syndr* 53: 415–416.
- Bussmann H, Wester CW, Ndwapu N, Grundmann N, Gaolathe T, et al. (2008) Five-year outcomes of initial patients treated in Botswana's National Antiretroviral Treatment Program. *AIDS* 22: 2303–2311.
- Innes C CS, Maraisane M, Senoge S, Seatlanyane P, et al. (2008) 24 and 36 month outcomes among HIV-infected individuals starting antiretroviral therapy in a workplace program in South Africa. *AIDS* 2008 - XVII International AIDS Conference Abstract no MOPE0046.
- Konate I, Traore L, Ouedraogo A, Sanon A, Diallo R, et al. (2011) Linking HIV prevention and care for community interventions among high-risk women in Burkina Faso—the ARNS 1222 "Yerelon" cohort. *J Acquir Immune Defic Syndr* 57 Suppl 1: S50–54.
- Nettles RE, Kieffer TL, Kwon P, Monie D, Han Y, et al. (2005) Intermittent HIV-1 viremia (Blips) and drug resistance in patients receiving HAART. *JAMA* 293: 817–829.
- Orrell C, Harling G, Lawn SD, Kaplan R, McNally M, et al. (2007) Conservation of first-line antiretroviral treatment regimen where therapeutic options are limited. *Antivir Ther* 12: 83–88.
- Lima VD, Bangsberg DR, Harrigan PR, Deeks SG, Yip B, et al. (2010) Risk of viral failure declines with duration of suppression on highly active antiretroviral therapy irrespective of adherence level. *J Acquir Immune Defic Syndr* 55: 460–465.
- Ekstrand ML CS, Steward W T, Panicker ST, Osmand T, Heylen E, Singh G. Barriers to long-term maintenance of HAART adherence and viral suppression in India, *AIDS* 2008, XVII International AIDS Conference, 2008 3-8 August 2008; Mexico City. pp. 361.
- Sethi AK, Celentano DD, Gange SJ, Moore RD, Gallant JE (2003) Association between adherence to antiretroviral therapy and human immunodeficiency virus drug resistance. *Clin Infect Dis* 37: 1112–1118.
- Roge BT, Barford TS, Kirk O, Katzenstein TL, Obel N, et al. (2004) Resistance profiles and adherence at primary virological failure in three different highly active antiretroviral therapy regimens: analysis of failure rates in a randomized study. *HIV Med* 5: 344–351.
- Gupta RK, Hill A, Sawyer AW, Cozzi-Lepri A, von Wyl V, et al. (2009) Virological monitoring and resistance to first-line highly active antiretroviral therapy in adults infected with HIV-1 treated under WHO guidelines: a systematic review and meta-analysis. *Lancet Infect Dis* 9: 409–417.
- Aleman S, Soderberg K, Visco-Comandini U, Sibton G, Sonnerborg A (2002) Drug resistance at low viraemia in HIV-1-infected patients with antiretroviral combination therapy. *AIDS* 16: 1039–1044.
- Verhofstede C, Van Wanzele F, Van Der Gucht B, Pelgrom J, Vandekerckhove L, et al. (2007) Detection of drug resistance mutations as a predictor of subsequent virological failure in patients with HIV-1 viral rebounds of less than 1,000 RNA copies/mL. *J Med Virol* 79: 1254–1260.
- Hoffmann CJ, Charalambous S, Sim J, Ledwaba J, Schwikard G, et al. (2009) Viremia, resuppression, and time to resistance in human immunodeficiency virus (HIV) subtype C during first-line antiretroviral therapy in South Africa. *Clin Infect Dis* 49: 1928–1935.
- El-Khatib Z, Delong AK, Katzenstein D, Ekstrom AM, Ledwaba J, et al. (2011) Drug resistance patterns and virus re-suppression among HIV-1 subtype C infected patients receiving non-nucleoside reverse transcriptase inhibitors in South Africa. *J AIDS Clin Res* 2.
- Barth RE, Aitken SC, Tempelman H, Geelen SP, van Bussel EM, et al. (2012) Accumulation of drug resistance and loss of therapeutic options precede commonly used criteria for treatment failure in HIV-1 subtype-C-infected patients. *Antivir Ther* 17: 377–386.
- Neogi U, Shet A, Shamsundar R, Ekstrand ML (2011) Selection of nonnucleoside reverse transcriptase inhibitor-associated mutations in HIV-1 subtype C: evidence of etravirine cross-resistance. *AIDS* 25: 1123–1126.
